# Supplementary material
Source: Springer Nature journal article supplement (https://www.springermedizin.de/resource/supplementary/13011_2014_316_MOESM2_ESM.pdf/9628854)

# Substance abuse treatment admissions for prescription opioids and prescription opioid overdose deaths by consumption levels of prescription opioids

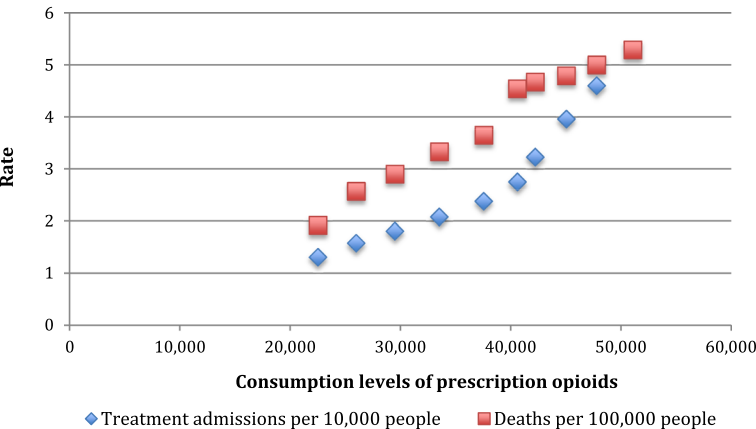

Supplement: MOESM2 [file 9628854]
